# Supplementary material for: Gas Chromatography–Mass Spectrometry-Based Classification of 12 Fennel (Foeniculum vulgare Miller) Varieties Based on Their Aroma Profiles and Estragole Levels as Analyzed Using Chemometric Tools
Source: PubMed Central journal article supplement — ACS Omega. 2021 Feb 12;6(8):5775–85. doi: 10.1021/acsomega.0c06188 (PMC7931402; doi:10.1021/acsomega.0c06188), 2021-02-12

**For submission to: ACS Omega**

**GC-MS based classification of 12 fennel (*Foeniculum vulgare* Mill.) varieties based on their aroma profiles and their estragole levels as analysed using chemometric tools**

**Sherif M. Afifi<sup>a</sup>, Amira El-Mahis<sup>b</sup>, Andreas G. Heiss<sup>c</sup>, Mohamed A. Farag<sup>d,\*</sup>**

<sup>a</sup> Pharmacognosy Department, Faculty of Pharmacy, University of Sadat City, Sadat City 32897, Egypt.

<sup>b</sup> Applied Research Center of Medicinal Plants, National Organization of Drug Control and Research, Cairo, Egypt.

<sup>c</sup> Department for Bioarchaeology, Austrian Archaeological Institute (OeAI), Austrian Academy of Sciences (OeAW), Franz Klein-Gasse 1, 1190 Vienna, Austria.

<sup>d</sup> Pharmacognosy Department, College of Pharmacy, Cairo University, Cairo, Egypt, Kasr El Aini St., P.B. 11562;

\*Corresponding author: Mohamed A. Farag

**Figure S1.** Unsupervised multivariate data analyses of the studied *Foeniculum vulgare* fruits derived from modeling volatile profiles of subsp. *vulgare* analyzed via GC-MS (n=3). PCA score plot of PC1 vs. PC2 scores. For codes refer to Table 1.

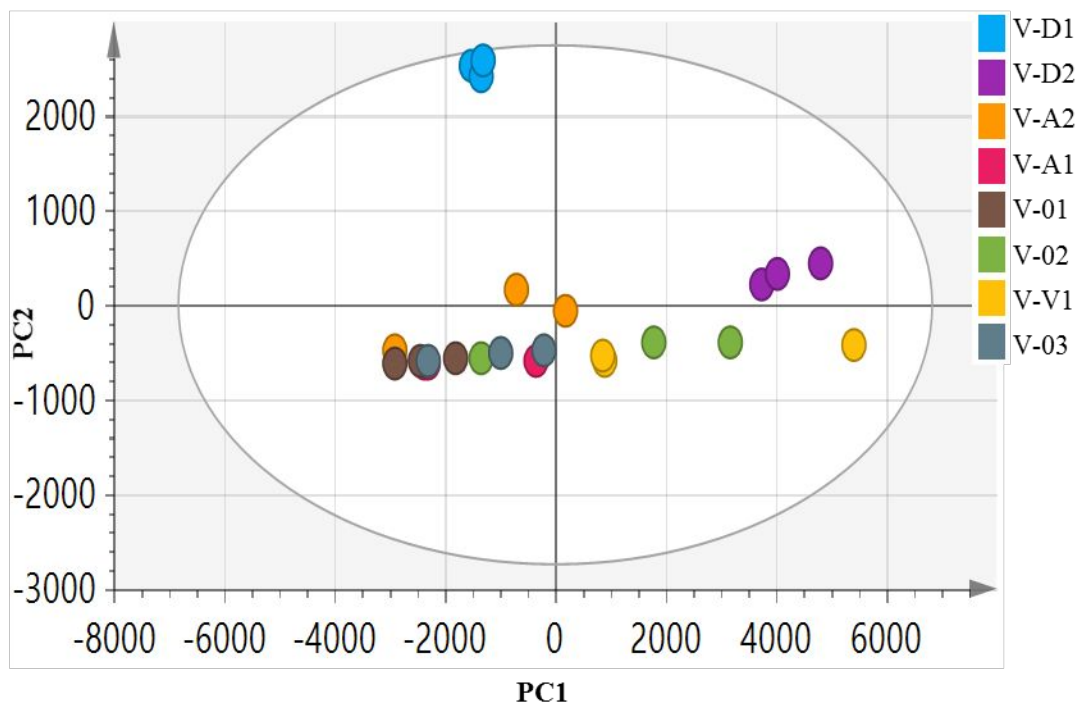

**Figure S2.** HCA of estragole alone in fennel varieties. P-02, P-03 and P-04 in red box are the highest in estragole. For codes refer to Table 1.

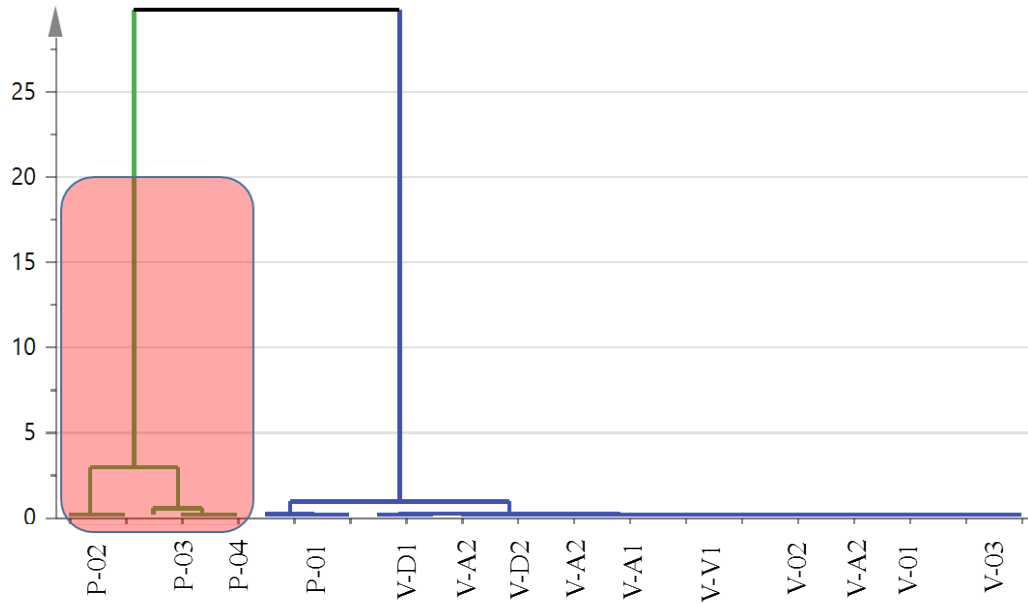

Supplement: ao0c06188_si_001.pdf [file ao0c06188_si_001.pdf]
